# Supplementary material for: TNF signaling mediates cellular immune function and promotes malaria parasite killing in the mosquito Anopheles gambiae
Source: PubMed Central journal article supplement (PMC11092648; doi:10.1101/2024.05.02.592209), 2024-05-05
Supplement: media-1.pdf [file media-1.pdf]

## ***Supporting Information***

### **TNF signaling mediates cellular immune function and promotes malaria parasite killing in the mosquito *Anopheles gambiae***

George-Rafael Samantsidis<sup>1</sup>, Hyeogsun Kwon<sup>1</sup>, Megan Wendland<sup>1</sup>, Catherine Fonder<sup>2</sup>, and Ryan C. Smith<sup>1\*</sup>

<sup>1</sup>Department of Plant Pathology, Entomology and Microbiology, Iowa State University, Ames, IA, USA.

<sup>2</sup>Molecular, Cellular and Developmental Biology Interdepartmental Graduate Program, Iowa State University, Ames, IA, USA.

\*Corresponding author: [smithr@iastate.edu](mailto:smithr@iastate.edu)

## **Included supporting information**

### ***Supplemental Figures***

**Figure S1.** Silencing efficiency of *Eiger*, *Grnd*, and *Wgn* genes in *An. gambiae*.

**Figure S2.** Expression of *Eiger*, *Wgn*, and *Grnd* in mosquito hemocyte populations.

### ***Supplemental Tables***

**Table S1.** List of primers used for gene expression and RNAi.

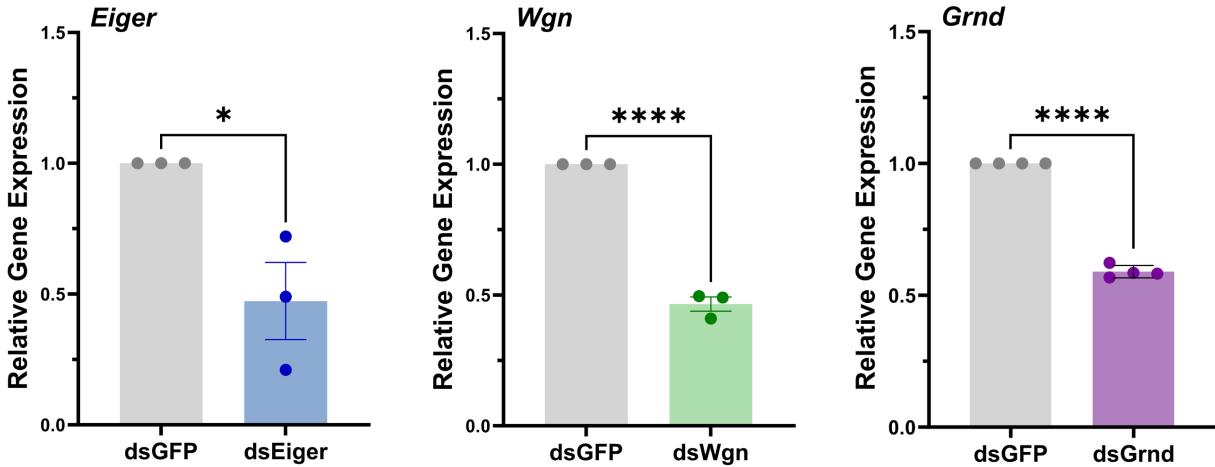

**Figure S1. Silencing efficiency of *Eiger*, *Grnd*, and *Wgn* genes in *An. gambiae*.** Naïve adult female mosquitoes were injected with dsRNA targeting *GFP* (control), *Eiger*, *Wgn*, or *Grnd*. Two days post-injection, whole-body mosquitoes (10-15 total) were collected for RNA extraction, followed by gene expression analysis using qPCR. Data from three or more independent experiment were examined for statistical significance using an unpaired student's t-test. Asterisks indicate significance (\*  $P < 0.05$ , \*\*\*\*  $P < 0.0001$ ).

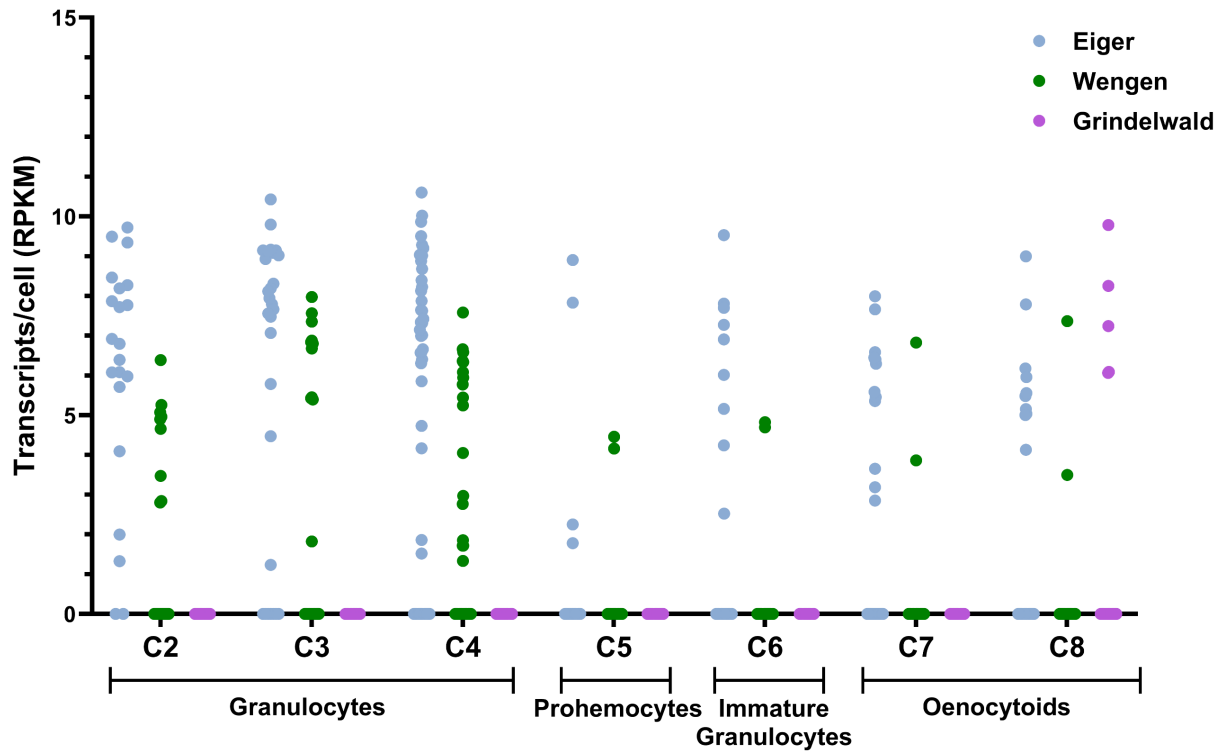

**Figure S2. Expression of *Eiger*, *Wgn*, and *Grnd* in mosquito hemocyte populations.** Using previously published single-cell RNA-seq data of *An. gambiae* hemocytes [22], the expression of *Eiger*, *Wgn*, and *Grnd* was evaluated for each mosquito immune cell subtype. Each dot represents a cell-specific gene expression value. RPKM, Reads Per Kilobase Per Million.

**Table S1. List of primers used for gene expression and RNAi.** Small letters indicate the T7 promoter sequence.

| <b><u>Gene</u></b> | <b><u>Forward (5'-3')</u></b>             | <b><u>Reverse (5'-3')</u></b>               |
|--------------------|-------------------------------------------|---------------------------------------------|
| AgGrnd-qPCR        | CAAGGCGGTGCCGAAGAATG                      | GCTTTCCGTCGAATCTTCCG                        |
| AgGrnd-T7          | taatacgactcactatagggGTGCGTGTGTGTGTGTTTCAG | taatacgactcactatagggCGGACCCTGTTTCCTTCTTGT   |
| AgEiger-qPCR       | TCCGCTGGGATGTAGAAAATCG                    | GGCGTGGTGGTGCTGTGATG                        |
| AgEiger-T7         | taatacgactcactatagggCAATGAGCTGAACGCTGGAA  | taatacgactcactatagggGGCTCGTTGATGGTAAGCTG    |
| AgWgn-qPCR         | GAGGAGATCCTGTGGGACTG                      | GCGTCAAAGTGCTTCTCGAT                        |
| AgWgn-T7           | taatacgactcactatagggAAGCATTATCGGCCAGCTC   | taatacgactcactatagggGGGAAGCCAGATTTTGGATCTAG |
